# Supplementary material
Source: PubMed Central journal article supplement (PMC6363842)
Supplement: NIHMS1512606-supplement-3.pdf [file NIHMS1512606-supplement-3.pdf]

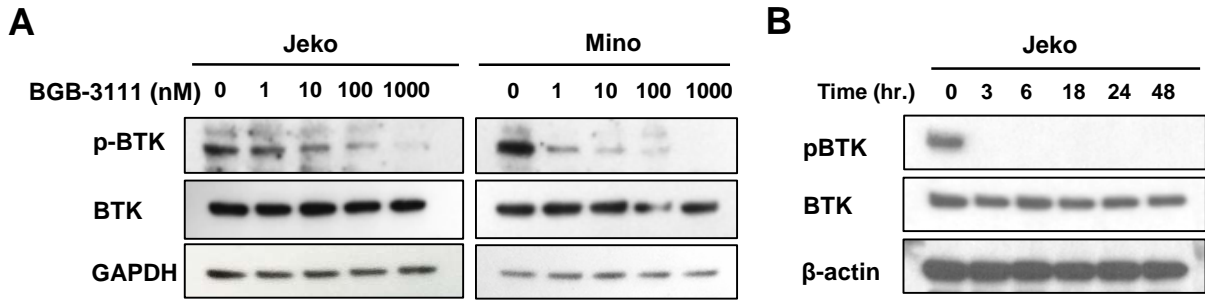

**Fig. S2. BGB-3111 inhibits the phosphorylation of BTK.** **A**, Immunoblotting of phospho-BTK (pBTK) and total BTK (BTK) in Jeko and Mino cells exposed to the indicated concentrations of BGB-3111 for 16 hr. **B**, Immunoblotting of phospho-BTK in Jeko and Mino cells at the indicated time points upon BGB311 treatment.
