# Supplementary material
Source: PubMed Central journal article supplement (PMC6363842)
Supplement: NIHMS1512606-supplement-4.pdf [file NIHMS1512606-supplement-4.pdf]

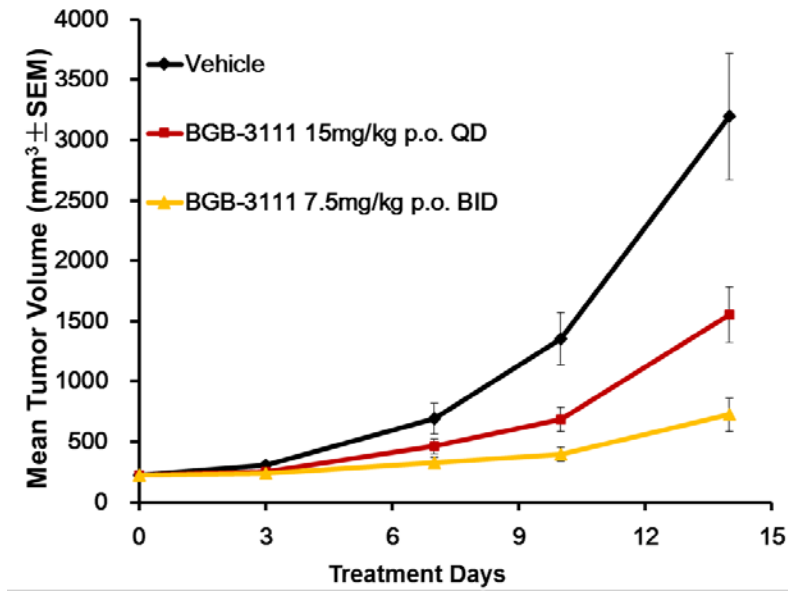

**Fig S3. QD vs. BID BGB-3111 Treatment in Rec-1 xenograft model.** Rec-1 cells were implanted into NOD/SCID mice as described in the Methods. Mice (10 in each treatment group) were treated with 15 mg/kg QD or 7.5 mg/kg BID BGB-3111 for 14 days. Tumor volume was measured twice weekly.
