# Supplementary material
Source: PubMed Central journal article supplement (PMC6363842)
Supplement: NIHMS1512606-supplement-5.pdf [file NIHMS1512606-supplement-5.pdf]

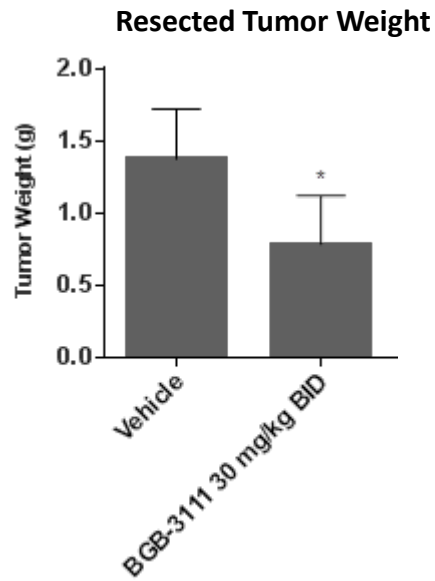

**Fig S4. Weight of Tumor Resected from MCL PDX model.** PDX mice treated with vehicle (N=5) or BGB-3111 (N=5), were sacrificed following 25 days of treatment. Comparative weights of tumor isolated from untreated vs. BGB-3111-treated mice is significant per unpaired t test (\*  $p < 0.05$ ).
