# Supplementary material
Source: PubMed Central journal article supplement (PMC6363842)
Supplement: NIHMS1512606-supplement-6.pdf [file NIHMS1512606-supplement-6.pdf]

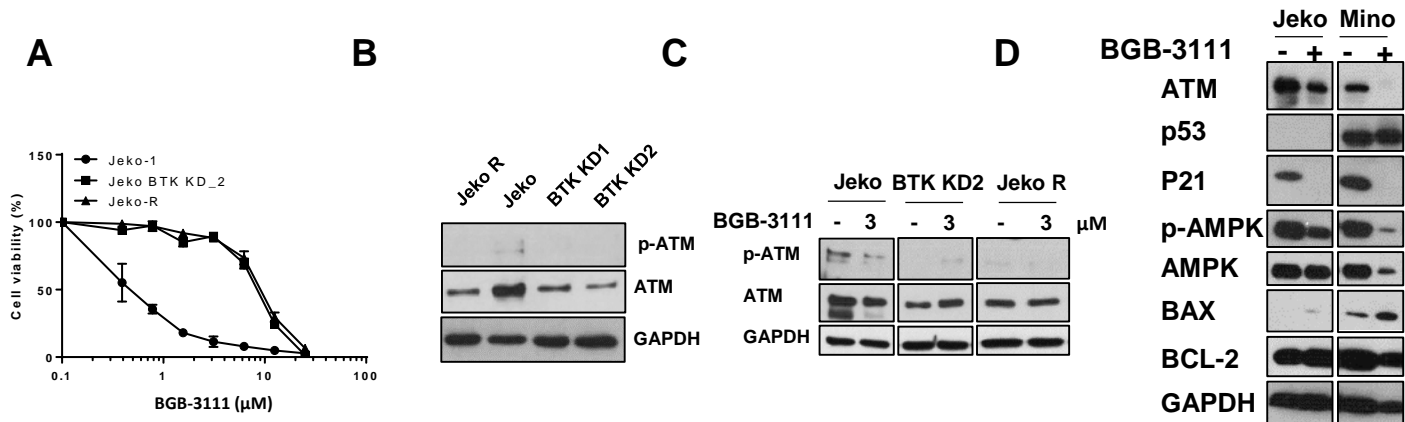

**Fig S5. Loss of BTK function leads to decreased ATM levels.** **A**, Cell viability of MCL cell lines following 72-hr treatment with BGB-3111. Drug concentrations are as follows: 0.03, 0.1, 0.3, 1, 3, 10, and 30  $\mu\text{M}$ . Luminescence was quantified by Cell TiterGlo Reagent and presented as the mean  $\pm$  SD of triplicate values. **B**, Total ATM and phospho-ATM levels in BTK knockdown mutants (BTK KD1 and KD2), Jeko and Jeko R cells. **C**, Total ATM and phospho-ATM levels in Jeko, Jeko R and BTK KD2 cells upon 3 hr-treatment with BGB-3111. **D**, Total ATM and its downstream components such as p53, P21, p-AMPK, BAX, and BCL-2 in Jeko and Mino cells upon 3 hr-treatment with BGB-3111. GAPDH was used as a loading control.
