# Supplementary material
Source: PubMed Central journal article supplement (PMC6363842)
Supplement: NIHMS1512606-supplement-7.pdf [file NIHMS1512606-supplement-7.pdf]

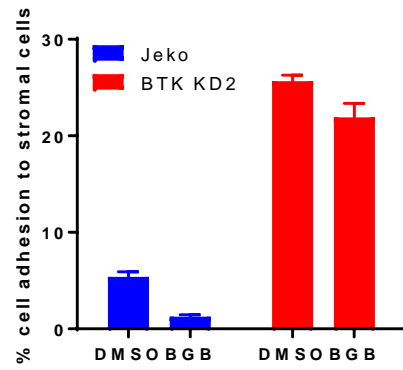

**Fig S6. BGB-3111 suppressed cell adhesion to stromal cells in drug-sensitive Jeko cells but not in the drug-resistant BTK KD2 cells.** Jeko and BTK KD2 cells were pretreated with BGB-311 (15  $\mu$ M) for 4 hours, stained with green fluorescence dye before and subsequent co-culture with stromal cells for 2 hours. The green MCL cells adherent to the stromal cells were measured and plotted. Each data point consists of three technical replicates.
